# Supplementary material
Source: Royal Society of Chemistry journal article supplement (doi:10.1039/d6cc01349j)
Supplement: d6cc01349j1.pdf [file d6cc01349j1.pdf]

Supplemental information for

Construction of p-Bi<sub>2</sub>O<sub>3</sub>/n-ZnO Nanowire Heterojunctions with Enhanced Photoelectrochemical Properties

Ying-Chu Chen,<sup>a</sup> Meng-Lei Lu<sup>b</sup> and Yu-Kuei Hsu<sup>\*b</sup>

<sup>a</sup> Department of Chemical Engineering & Biotechnology, National Taipei University of Technology, Taipei City, 10608, Taiwan.

<sup>B</sup> Department of Opto-Electronic Engineering, National Dong Hwa University, No. 1, Sec. 2, Da Hsueh Road, Shoufeng, Hualien, 97401, Taiwan.

\*Correspondence to

Yu-Kuei Hsu: [ykhsu@gms.ndhu.edu.tw](mailto:ykhsu@gms.ndhu.edu.tw)

## Experimental Section

### Synthesis of Bi<sub>2</sub>O<sub>3</sub>/ZnO Nanowire Heterostructures

ZnO nanowire (NW) arrays were first grown on FTO-coated glass substrates using a hydrothermal method adapted from our previous work [12]. Prior to growth, a seed layer was deposited by spin-coating 80  $\mu$ L of 15 mM zinc acetate ( $\text{Zn}(\text{CH}_3\text{COO})_2$ ) in ethanol onto the FTO substrate, followed by thermal decomposition at 350  $^\circ\text{C}$  for 5 min to form nanocrystalline ZnO seeds. The seeded substrate was then immersed in an aqueous growth solution containing 5 mM zinc nitrate ( $\text{Zn}(\text{NO}_3)_2$ ), 5 mM hexamethylenetetramine (HMTA), 5 mM polyethyleneimine (PEI), and 0.25 M ammonium hydroxide ( $\text{NH}_4\text{OH}$ ). The reaction was conducted at 65  $^\circ\text{C}$  for 24 h to yield vertically aligned ZnO NWs. The as-grown NWs were subsequently annealed in air at 550  $^\circ\text{C}$  for 5 h to enhance crystallinity and remove organic residues.

For Bi<sub>2</sub>O<sub>3</sub> deposition, the ZnO NW/FTO substrates were immersed in an ethylene glycol solution containing 10 mM bismuth nitrate ( $\text{Bi}(\text{NO}_3)_3$ ) and heated to 190  $^\circ\text{C}$  under reflux for 3 h. The resulting samples were then annealed in air at 300, 400, or 500  $^\circ\text{C}$  for 1 h to form the final Bi<sub>2</sub>O<sub>3</sub>/ZnO heterostructures.

### Materials Characterization

Surface morphology was examined using scanning electron microscopy (SEM, JEM-4000EX). Crystal structure and phase purity were analyzed by X-ray diffraction (XRD) and Raman spectroscopy. Chemical states were investigated by X-ray photoelectron spectroscopy (XPS, Perkin-Elmer PHI 1600). High-resolution microstructural and compositional analyses were performed using scanning transmission electron microscopy (HR-STEM, JEM2010F and JEM2200FS, JEOL) operating at 200 kV. Optical properties were characterized by UV-Vis absorption spectroscopy.

### Photoelectrochemical Measurements

Photoelectrochemical (PEC) measurements were conducted in a three-electrode configuration using a potentiostat/galvanostat (CHI 6273D). The Bi<sub>2</sub>O<sub>3</sub>/ZnO NW electrode served as the working electrode, with a Pt sheet (4 cm<sup>2</sup>) as the counter electrode and an Ag/AgCl (3 M KCl) reference electrode. A 0.5 M Na<sub>2</sub>SO<sub>4</sub> solution was used as the electrolyte. All potentials are reported relative to Ag/AgCl.

Illumination was provided by a 150 W Xe lamp equipped with an AM 1.5G filter, calibrated to 100 mW·cm<sup>-2</sup> at the sample surface. Linear sweep voltammetry (LSV) was performed under both

continuous and chopped illumination at a scan rate of  $10 \text{ mV}\cdot\text{s}^{-1}$ . The illuminated area for all PEC measurements was precisely defined using a circular mask with an area of  $1 \text{ cm}^2$ . Incident photon-to-current conversion efficiency (IPCE) was measured using a monochromator coupled to the Xe lamp, with light incident from the front side through a quartz window and the electrolyte. Electrochemical impedance spectroscopy (EIS) was carried out over a frequency range of 100 kHz to 0.1 Hz with an AC amplitude of 10 mV at an applied potential of 0.3 V under illumination. Mott–Schottky analysis was performed in the dark at a frequency of 1 kHz.

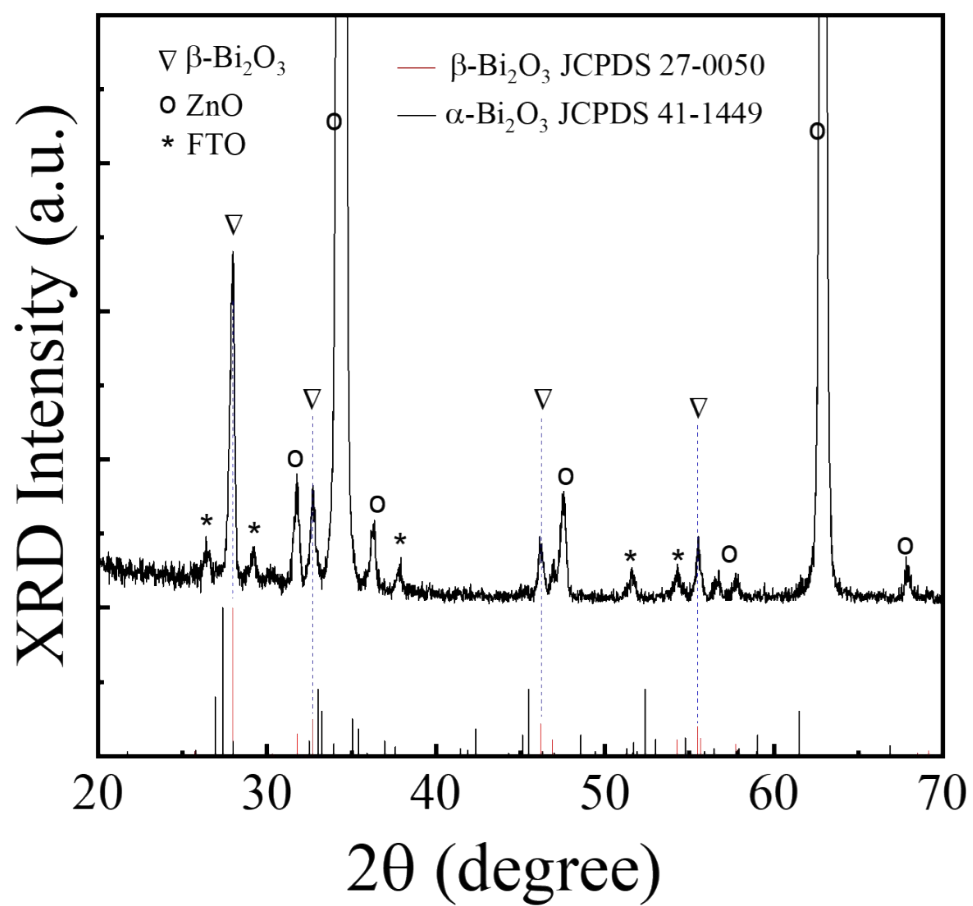

**Figure S1.** XRD pattern with peak indexing and standard reference overlays.

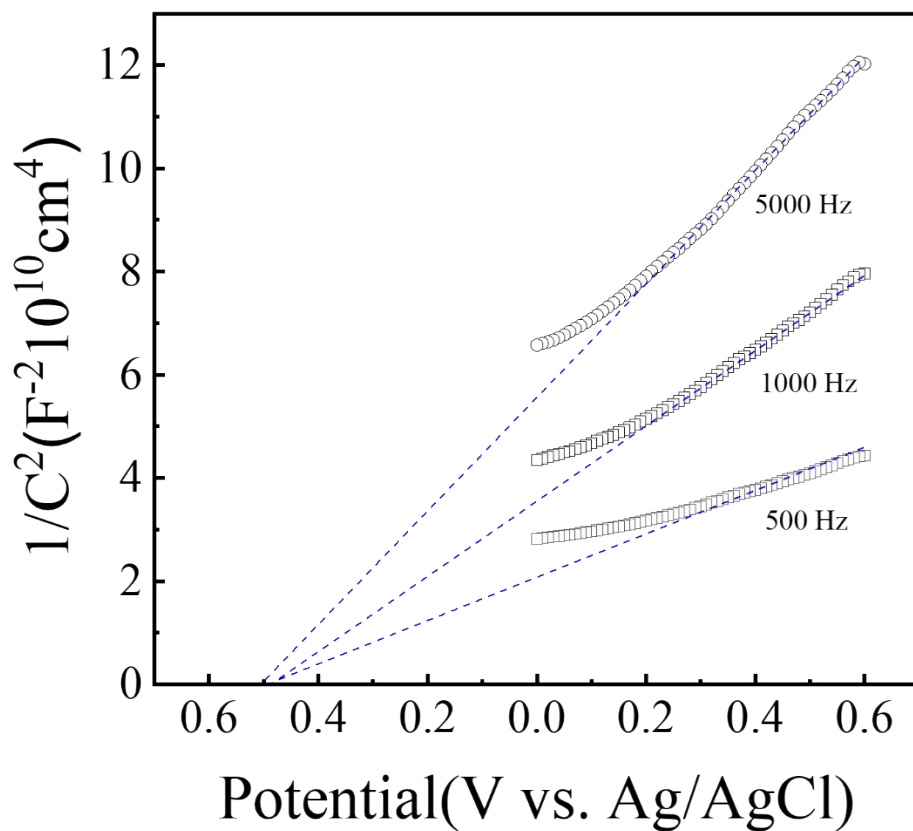

**Figure S2.** Frequency-dependent Mott–Schottky measurements at 500 Hz, 1 kHz, and 5 kHz.

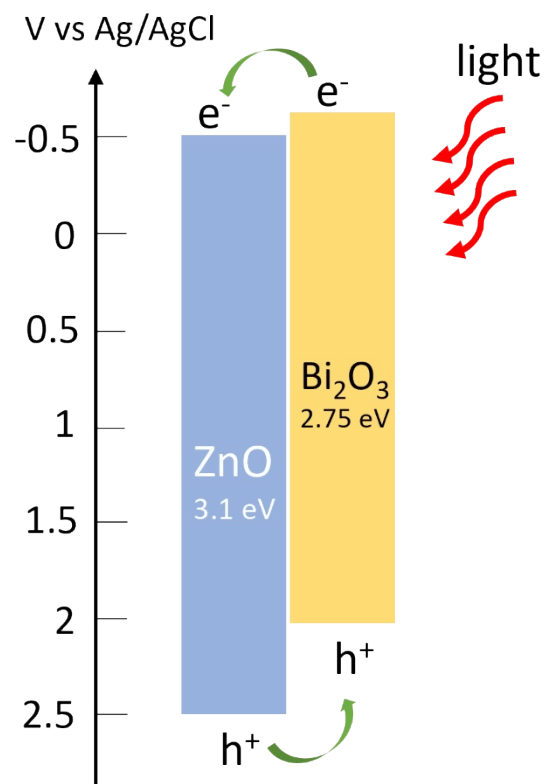

**Figure S3.** Schematic band structure diagram for the Bi<sub>2</sub>O<sub>3</sub>/ZnO heterojunction.

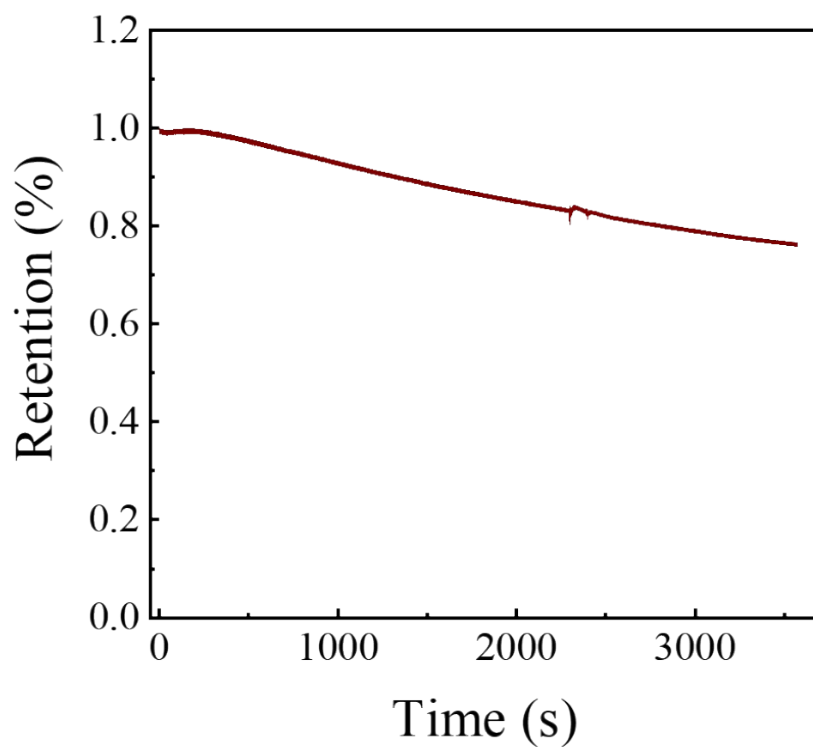

**Figure S4.** Chronoamperometric (*i*-*t*) measurements on the Bi<sub>2</sub>O<sub>3</sub>/ZnO (400 °C) electrodes at a constant applied potential of 0.3 V vs. Ag/AgCl under AM 1.5G illumination for 3600 s.
